# Supplementary material
Source: PubMed Central journal article supplement (PMC7402023)
Supplement: MRM-84-2858-s001.pdf [file MRM-84-2858-s001.pdf]

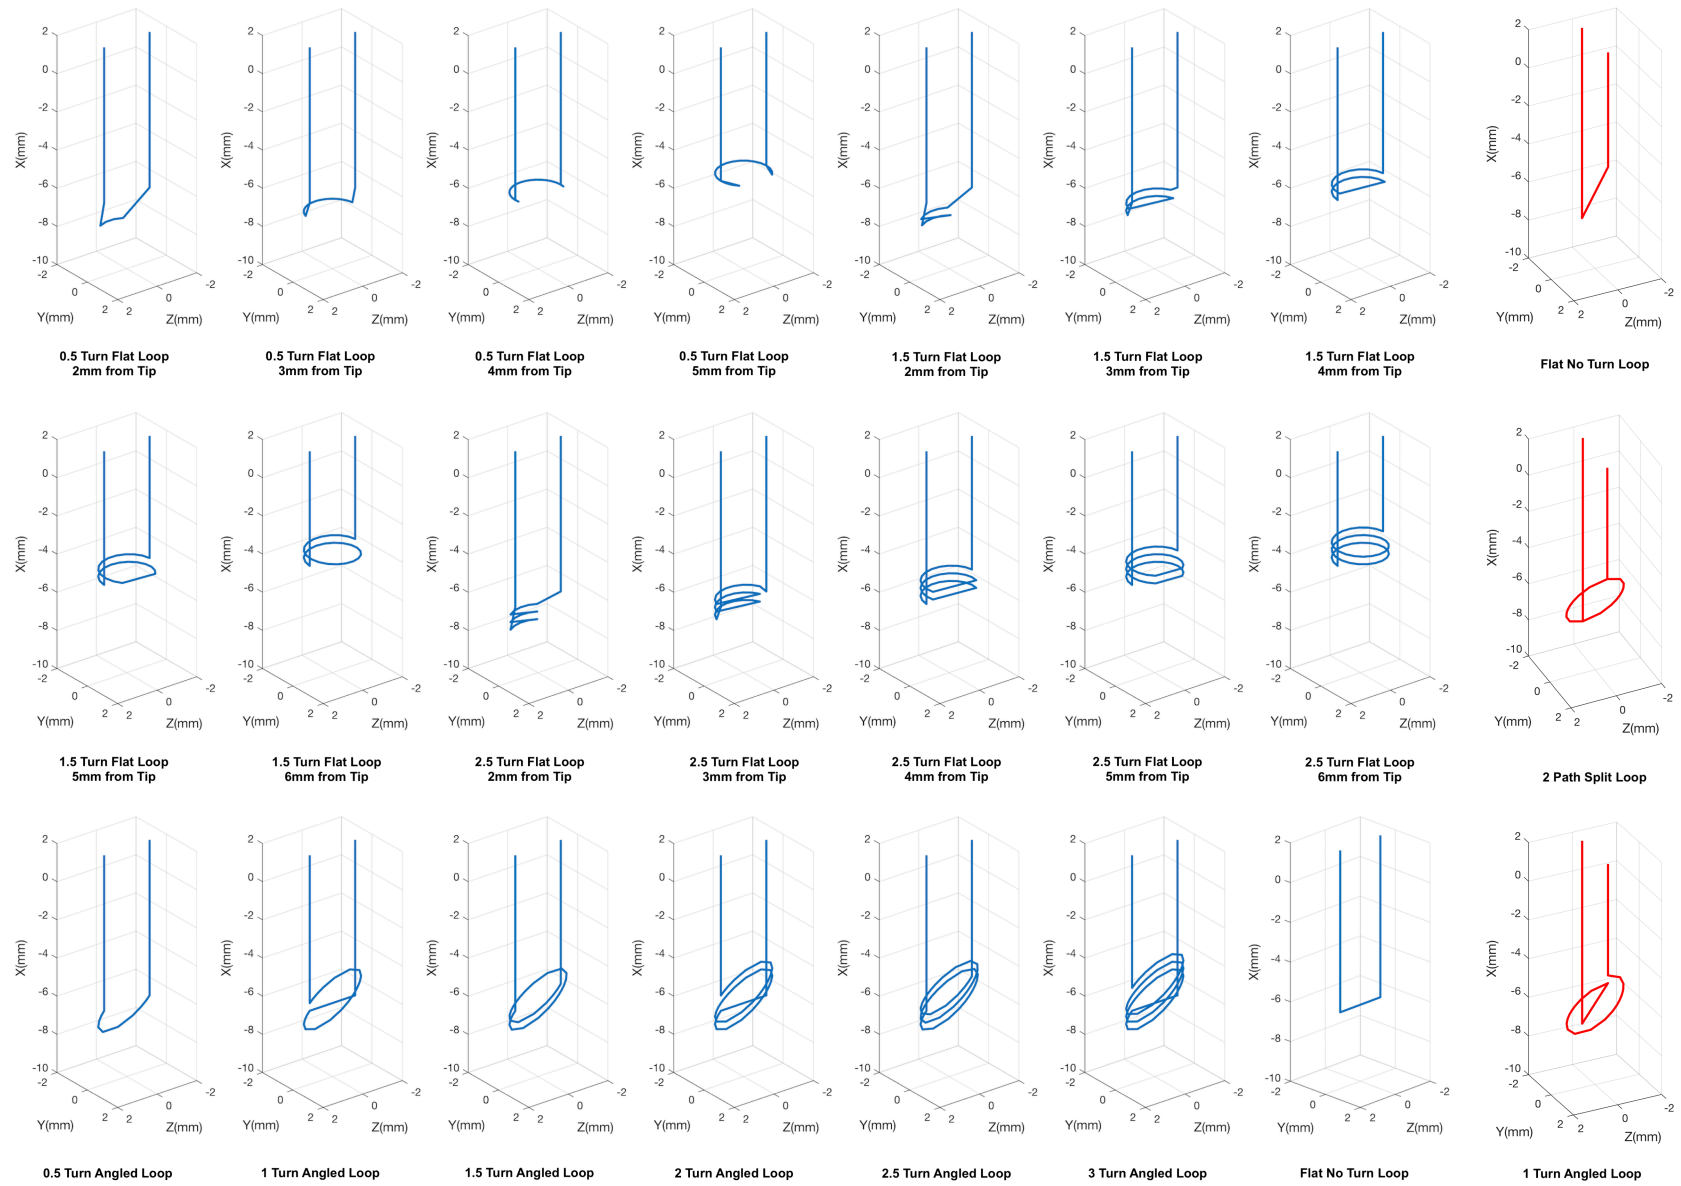

**Supporting Information Figure S1**

21 CN90 (blue) and 3 CN0 (red) coils considered for the shim optimization in pairs. All coils are shown in the magnet frame in the 0,0,0 orientation. In all coils, the leads were designed such that they were either along the needle's Y = 0 (for CN0) or Z = 0 (for CN90) axes to maintain orthogonality in the body of the needle. This was irrespective of the clearance from the beveled tip that caused some coils to be truncated. Truncation was not required for coils with clearance greater than ~6 mm.

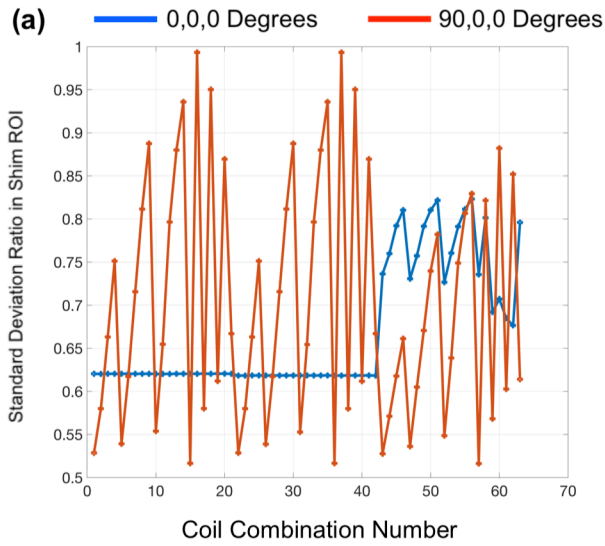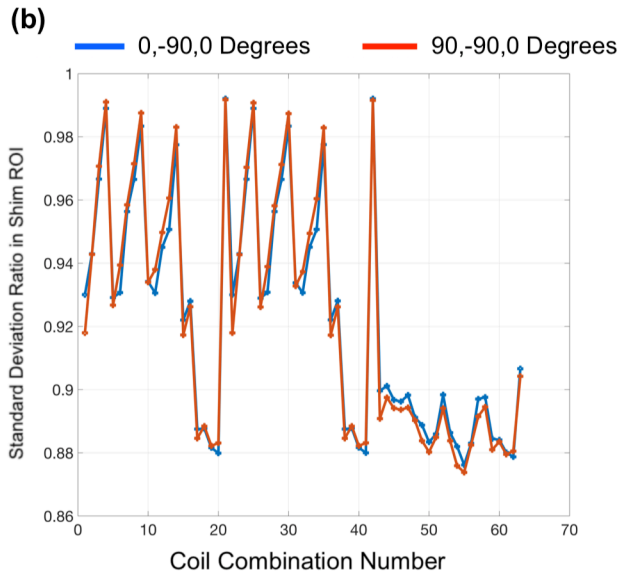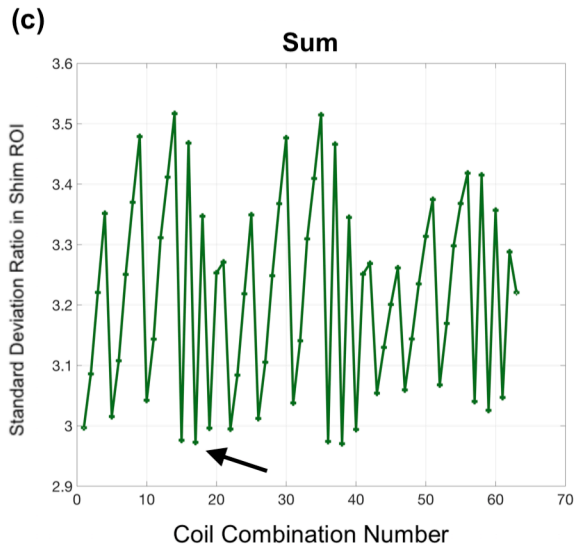

| Coil Combination Number | CN0                | CN90                                 |
|-------------------------|--------------------|--------------------------------------|
| 1                       | Flat No Turn Loop  | 0.5 Turn Flat Loop 2mm From Tip      |
| 2                       | Flat No Turn Loop  | 0.5 Turn Flat Loop 3mm From Tip      |
| 3                       | Flat No Turn Loop  | 0.5 Turn Flat Loop 4mm From Tip      |
| 4                       | Flat No Turn Loop  | 0.5 Turn Flat Loop 5mm From Tip      |
| 5                       | Flat No Turn Loop  | 1.5 Turn Flat Loop 2mm From Tip      |
| 6                       | Flat No Turn Loop  | 1.5 Turn Flat Loop 3mm From Tip      |
| 7                       | Flat No Turn Loop  | 1.5 Turn Flat Loop 4mm From Tip      |
| 8                       | Flat No Turn Loop  | 1.5 Turn Flat Loop 5mm From Tip      |
| 9                       | Flat No Turn Loop  | 1.5 Turn Flat Loop 6mm From Tip      |
| 10                      | Flat No Turn Loop  | 2.5 Turn Flat Loop 2mm From Tip      |
| 11                      | Flat No Turn Loop  | 2.5 Turn Flat Loop 3mm From Tip      |
| 12                      | Flat No Turn Loop  | 2.5 Turn Flat Loop 4mm From Tip      |
| 13                      | Flat No Turn Loop  | 2.5 Turn Flat Loop 5mm From Tip      |
| 14                      | Flat No Turn Loop  | 2.5 Turn Flat Loop 6mm From Tip      |
| 15                      | Flat No Turn Loop  | 0.5 Turn Angled Loop 3.85mm From Tip |
| 16                      | Flat No Turn Loop  | 1 Turn Angled Loop 3.85mm From Tip   |
| 17                      | Flat No Turn Loop  | 1.5 Turn Angled Loop 3.85mm From Tip |
| 18                      | Flat No Turn Loop  | 2 Turn Angled Loop 3.85mm From Tip   |
| 19                      | Flat No Turn Loop  | 2.5 Turn Angled Loop 3.85mm From Tip |
| 20                      | Flat No Turn Loop  | 3 Turn Angled Loop 3.85mm From Tip   |
| 21                      | Flat No Turn Loop  | Flat No Turn Loop 3.85mm From Tip    |
| 22                      | Split Loop         | 0.5 Turn Flat Loop 2mm From Tip      |
| 23                      | Split Loop         | 0.5 Turn Flat Loop 3mm From Tip      |
| 24                      | Split Loop         | 0.5 Turn Flat Loop 4mm From Tip      |
| 25                      | Split Loop         | 0.5 Turn Flat Loop 5mm From Tip      |
| 26                      | Split Loop         | 1.5 Turn Flat Loop 2mm From Tip      |
| 27                      | Split Loop         | 1.5 Turn Flat Loop 3mm From Tip      |
| 28                      | Split Loop         | 1.5 Turn Flat Loop 4mm From Tip      |
| 29                      | Split Loop         | 1.5 Turn Flat Loop 5mm From Tip      |
| 30                      | Split Loop         | 1.5 Turn Flat Loop 6mm From Tip      |
| 31                      | Split Loop         | 2.5 Turn Flat Loop 2mm From Tip      |
| 32                      | Split Loop         | 2.5 Turn Flat Loop 3mm From Tip      |
| 33                      | Split Loop         | 2.5 Turn Flat Loop 4mm From Tip      |
| 34                      | Split Loop         | 2.5 Turn Flat Loop 5mm From Tip      |
| 35                      | Split Loop         | 2.5 Turn Flat Loop 6mm From Tip      |
| 36                      | Split Loop         | 0.5 Turn Angled Loop 3.85mm From Tip |
| 37                      | Split Loop         | 1 Turn Angled Loop 3.85mm From Tip   |
| 38                      | Split Loop         | 1.5 Turn Angled Loop 3.85mm From Tip |
| 39                      | Split Loop         | 2 Turn Angled Loop 3.85mm From Tip   |
| 40                      | Split Loop         | 2.5 Turn Angled Loop 3.85mm From Tip |
| 41                      | Split Loop         | 3 Turn Angled Loop 3.85mm From Tip   |
| 42                      | Split Loop         | Flat No Turn Loop 3.85mm From Tip    |
| 43                      | 1 Turn Angled Loop | 0.5 Turn Flat Loop 2mm From Tip      |
| 44                      | 1 Turn Angled Loop | 0.5 Turn Flat Loop 3mm From Tip      |
| 45                      | 1 Turn Angled Loop | 0.5 Turn Flat Loop 4mm From Tip      |
| 46                      | 1 Turn Angled Loop | 0.5 Turn Flat Loop 5mm From Tip      |
| 47                      | 1 Turn Angled Loop | 1.5 Turn Flat Loop 2mm From Tip      |
| 48                      | 1 Turn Angled Loop | 1.5 Turn Flat Loop 3mm From Tip      |
| 49                      | 1 Turn Angled Loop | 1.5 Turn Flat Loop 4mm From Tip      |
| 50                      | 1 Turn Angled Loop | 1.5 Turn Flat Loop 5mm From Tip      |
| 51                      | 1 Turn Angled Loop | 1.5 Turn Flat Loop 6mm From Tip      |
| 52                      | 1 Turn Angled Loop | 2.5 Turn Flat Loop 2mm From Tip      |
| 53                      | 1 Turn Angled Loop | 2.5 Turn Flat Loop 3mm From Tip      |
| 54                      | 1 Turn Angled Loop | 2.5 Turn Flat Loop 4mm From Tip      |
| 55                      | 1 Turn Angled Loop | 2.5 Turn Flat Loop 5mm From Tip      |
| 56                      | 1 Turn Angled Loop | 2.5 Turn Flat Loop 6mm From Tip      |
| 57                      | 1 Turn Angled Loop | 0.5 Turn Angled Loop 3.85mm From Tip |
| 58                      | 1 Turn Angled Loop | 1 Turn Angled Loop 3.85mm From Tip   |
| 59                      | 1 Turn Angled Loop | 1.5 Turn Angled Loop 3.85mm From Tip |
| 60                      | 1 Turn Angled Loop | 2 Turn Angled Loop 3.85mm From Tip   |
| 61                      | 1 Turn Angled Loop | 2.5 Turn Angled Loop 3.85mm From Tip |
| 62                      | 1 Turn Angled Loop | 3 Turn Angled Loop 3.85mm From Tip   |
| 63                      | 1 Turn Angled Loop | Flat No Turn Loop 3.85mm From Tip    |

### Supporting Information Figure S2

Results of shim optimization with 63 coil combinations (3 CN0 and 21 CN90 coils) in 4 orientations. Plots show the ratio of the standard deviation of the field after over before shimming in (a) 0,0,0 and 90,0,0 degree and (b) 0,-90,0 and 90,-90,0 degree needle orientations. (c) Sum of the four ratios and identification of combination 17 (Flat No Turn Loop CN0 and 1.5 Turn Angled Loop CN90, Black Arrow) as the best pair. It can be seen that many coil combinations perform well in certain orientations but fail in others.
